# Supplementary material for: Understanding the Value of a Proactive Telecare System in Supporting Older Adults’ Independence at Home: Qualitative Interview Study Among Key Interest Groups
Source: PubMed Central journal article supplement (PMC10732490; doi:10.2196/47997), 2023-12-14
Supplement: jmir_v25i1e47997_app1.pdf [file jmir_v25i1e47997_app1.pdf]

Supplementary file 1. Checklist for adherence to the consolidated criteria for reporting qualitative studies (COREQ)

| Topic and Item No.                             | Guide Questions/Description                                                                                                                                                                        | Response                                                                                                                                                                 |
|------------------------------------------------|----------------------------------------------------------------------------------------------------------------------------------------------------------------------------------------------------|--------------------------------------------------------------------------------------------------------------------------------------------------------------------------|
| <b>Domain 1: Research team and reflexivity</b> |                                                                                                                                                                                                    |                                                                                                                                                                          |
| Personal Characteristics                       |                                                                                                                                                                                                    |                                                                                                                                                                          |
|                                                | 1. Interviewer/facilitator: Which author/s conducted the interviews?                                                                                                                               | Lauren Fothergill (LF)                                                                                                                                                   |
|                                                | 2. Credentials: What were the researcher's credentials? E.g. PhD, MD                                                                                                                               | LF: MPH                                                                                                                                                                  |
|                                                | 3. Occupation: What was their occupation at the time of the study?                                                                                                                                 | LF: Research Assistant/ PhD student                                                                                                                                      |
|                                                | 4. Gender: Was the researcher male or female?                                                                                                                                                      | Female                                                                                                                                                                   |
|                                                | 5. Experience and training: What experience or training did the researcher have?                                                                                                                   | LF: Mixed-methods researcher, experienced interviewer, GCP trained.                                                                                                      |
| Relationship with participants                 |                                                                                                                                                                                                    |                                                                                                                                                                          |
|                                                | 6. Relationship established: Was a relationship established prior to study commencement?                                                                                                           | Researcher met the participants during recruitment                                                                                                                       |
|                                                | 7. Participant knowledge of the interviewer: What did the participants know about the researcher? e.g. personal goals, reasons for doing the research                                              | Participants knew that LF was a researcher. They knew that the researcher was affiliated to the participating university.                                                |
|                                                | 8. Interviewer characteristics: What characteristics were reported about the interviewer/facilitator? e.g. Bias, assumptions, reasons and interests in the research topic                          | Participants knew that the researcher were interested in their perspectives of the utility of using proactive telecare and to what extent it could support independence. |
| <b>Domain 2: Study design</b>                  |                                                                                                                                                                                                    |                                                                                                                                                                          |
| Theoretical framework                          |                                                                                                                                                                                                    |                                                                                                                                                                          |
|                                                | 9. Methodological orientation and Theory: What methodological orientation was stated to underpin the study? e.g. grounded theory, discourse analysis, ethnography, phenomenology, content analysis | Thematic analysis                                                                                                                                                        |
| Participant selection                          |                                                                                                                                                                                                    |                                                                                                                                                                          |
|                                                | 10. Sampling: How were participants selected? e.g.                                                                                                                                                 | Purposive (e.g. for older adults – they were using                                                                                                                       |

|                 |                                                                                                              |                                                                                                                                                                                                                                              |
|-----------------|--------------------------------------------------------------------------------------------------------------|----------------------------------------------------------------------------------------------------------------------------------------------------------------------------------------------------------------------------------------------|
|                 | purposive, convenience, consecutive, snowball                                                                | proactive telecare, family members – they had a relative using proactive telecare, staff – they were involved in delivering proactive telecare, older adults not currently using telecare – recruited from local older adult social groups). |
|                 | 11. Method of approach: How were participants approached? e.g. face-to-face, telephone, mail, email          | Participants were approached and recruited via telephone.                                                                                                                                                                                    |
|                 | 12. Sample size : How many participants were in the study?                                                   | 30 semi-structured interviews were conducted across various participant groups; (20 older adults, 4 family members and 6 staff members).                                                                                                     |
|                 | 13. Non-participation: How many people refused to participate or dropped out? Reasons?                       | Three people showed interest in the study but were not able to attend due to other commitments.                                                                                                                                              |
| Setting         |                                                                                                              |                                                                                                                                                                                                                                              |
|                 | 14. Setting of data collection: Where was the data collected? e.g. home, clinic, workplace                   | Data were collected over the phone.                                                                                                                                                                                                          |
|                 | 15. Presence of non-participants; Was anyone else present besides the participants and researchers?          | No.                                                                                                                                                                                                                                          |
|                 | 16. Description of sample: What are the important characteristics of the sample? e.g. demographic data, date | Older adults: age, gender, level of care, level of mobility, living arrangements, ethnicity, previous occupation. Staff: organisation, age, gender. Family member: age, gender, age of family member using proactive telecare.               |
| Data collection |                                                                                                              |                                                                                                                                                                                                                                              |
|                 | 17. Interview guide: Were questions, prompts, guides provided by the authors? Was it pilot tested?           | No                                                                                                                                                                                                                                           |

|                                        |                                                                                                                                                             |                                                                                                                                  |
|----------------------------------------|-------------------------------------------------------------------------------------------------------------------------------------------------------------|----------------------------------------------------------------------------------------------------------------------------------|
|                                        | 18. Repeat interviews: Were repeat interviews carried out? If yes, how many?                                                                                | No                                                                                                                               |
|                                        | 19. Audio/visual recording; Did the research use audio or visual recording to collect the data?                                                             | Interviews were audio-recorded using a recording device.                                                                         |
|                                        | 20. Field notes: Were field notes made during and/or after the interview or focus group?                                                                    | Yes.                                                                                                                             |
|                                        | 21. Duration: What was the duration of the interviews or focus group?                                                                                       | Approx. 44 minutes (range from 25-80 minutes).                                                                                   |
|                                        | 22. Data saturation: Was data saturation discussed?                                                                                                         | Yes.                                                                                                                             |
|                                        | 23. Transcripts returned: Were transcripts returned to participants for comment and/or correction?                                                          | No                                                                                                                               |
| <b>Domain 3: analysis and findings</b> |                                                                                                                                                             |                                                                                                                                  |
| Data analysis                          |                                                                                                                                                             |                                                                                                                                  |
|                                        | 24. Number of data coders: How many data coders coded the data?                                                                                             | One researcher was involved in coding, however, the themes were discussed between three researchers until themes were finalised. |
|                                        | 25. Description of the coding tree: Did authors provide a description of the coding tree?                                                                   | No, however initial coding was informed by the interview guide, and coding was continuously refined.                             |
|                                        | 26. Derivation of themes: Were themes identified in advance or derived from the data?                                                                       | Themes were derived from the data.                                                                                               |
|                                        | 27. Software: What software, if applicable, was used to manage the data?                                                                                    | NVivo 12                                                                                                                         |
|                                        | 28. Participant checking: Did participants provide feedback on the findings?                                                                                | No                                                                                                                               |
| Reporting                              |                                                                                                                                                             |                                                                                                                                  |
|                                        | 29. Quotations presented: Were participant quotations presented to illustrate the themes / findings? Was each quotation identified? e.g. participant number | Yes                                                                                                                              |
|                                        | 30. Data and findings consistent: Was there consistency between the data presented and the findings?                                                        | Yes                                                                                                                              |

|  |                                                                                                     |     |
|--|-----------------------------------------------------------------------------------------------------|-----|
|  | 31. Clarity of major themes: Were major themes clearly presented in the findings?                   | Yes |
|  | 32. Clarity of minor themes: Is there a description of diverse cases or discussion of minor themes? | Yes |
